# Supplementary material for: A novel molecular-clinicopathologic nomogram to improve prognosis prediction of hepatocellular carcinoma
Source: Aging (Albany NY). 2020 Jun 30;12(13):12896–920. doi: 10.18632/aging.103350 (PMC7377850; doi:10.18632/aging.103350)
Supplement: Supplementary Figures [file aging-12-103350-s008..pdf]

## SUPPLEMENTARY FIGURES

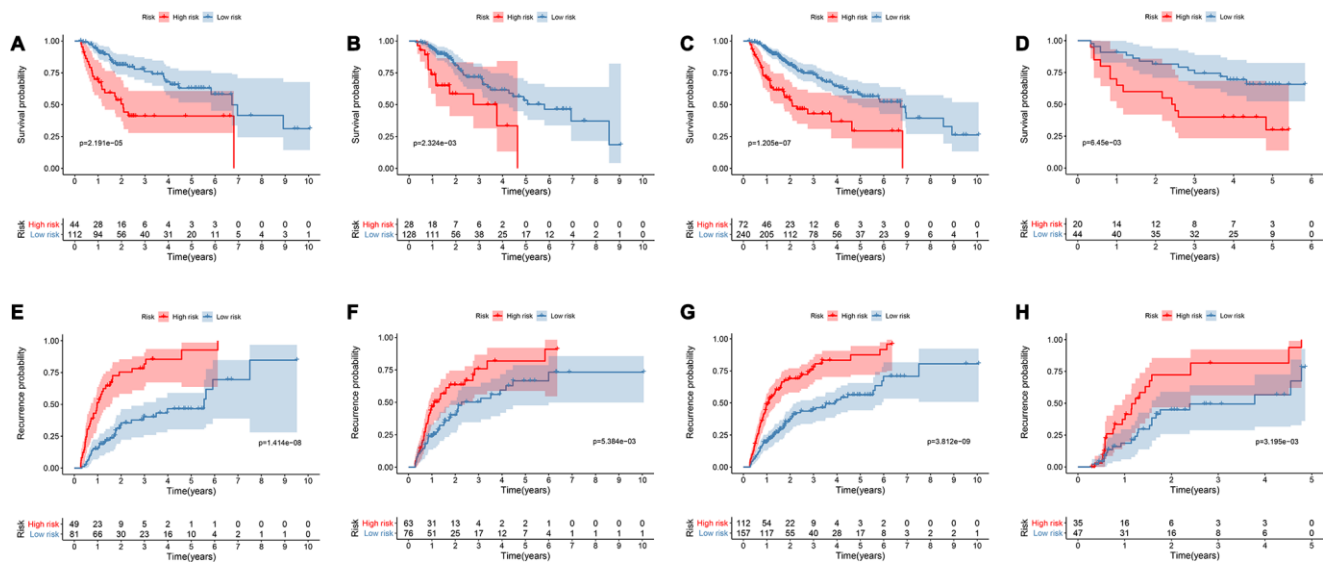

**Supplementary Figure 1. Kaplan-Meier analysis in the training, validation and whole cohorts according to the lncRNA-based classifiers.** Kaplan-meier survival analysis was performed to predict overall survival in the (A) training cohort, (B) test cohort, (C) TCGA cohort and (D) GEO cohort, according to the high-risk and low-risk groups stratified by the 8-lncRNAs-based classifier. Kaplan-meier survival analysis was performed to predict recurrence in the (E) training cohort, (F) test cohort, (G) TCGA cohort and (H) GEO cohort, according to the high-risk and low-risk groups stratified by the 14-lncRNAs-based classifier.

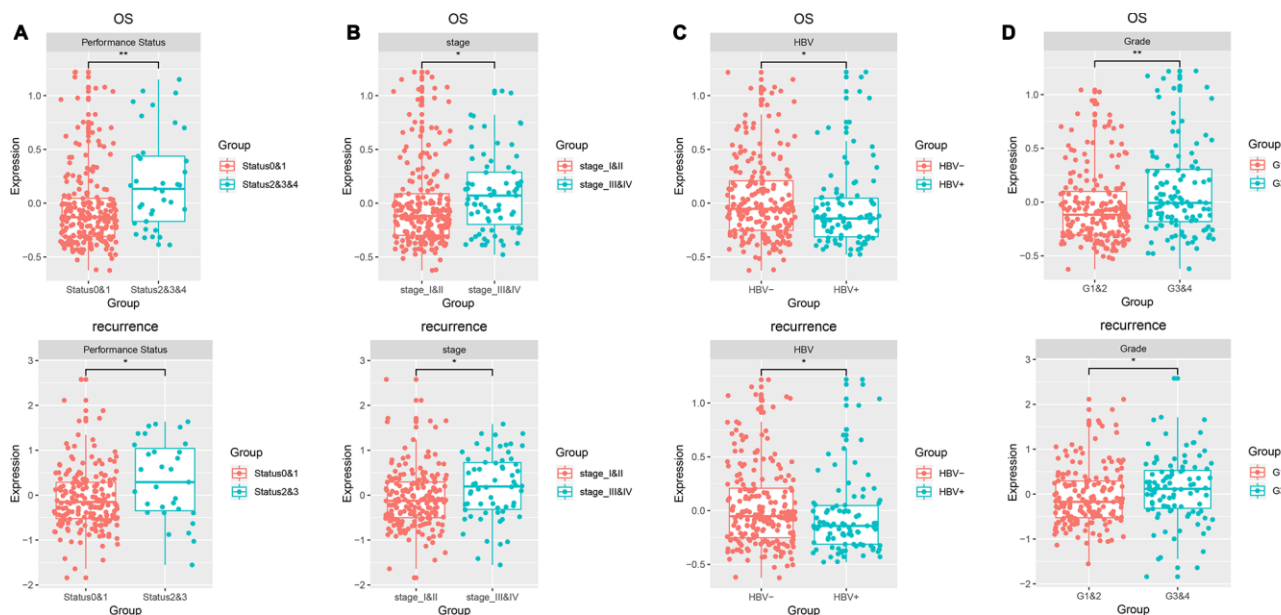

**Supplementary Figure 2. Boxplot of lncRNA-based classifier score in patients with clinicopathological risk factors.** Boxplot of 8-lncRNAs-based classifier score and 14-lncRNAs-based classifier score in patients with (A) Performance Status, (B) TNM stage, (C) HBV, and (D) grade.

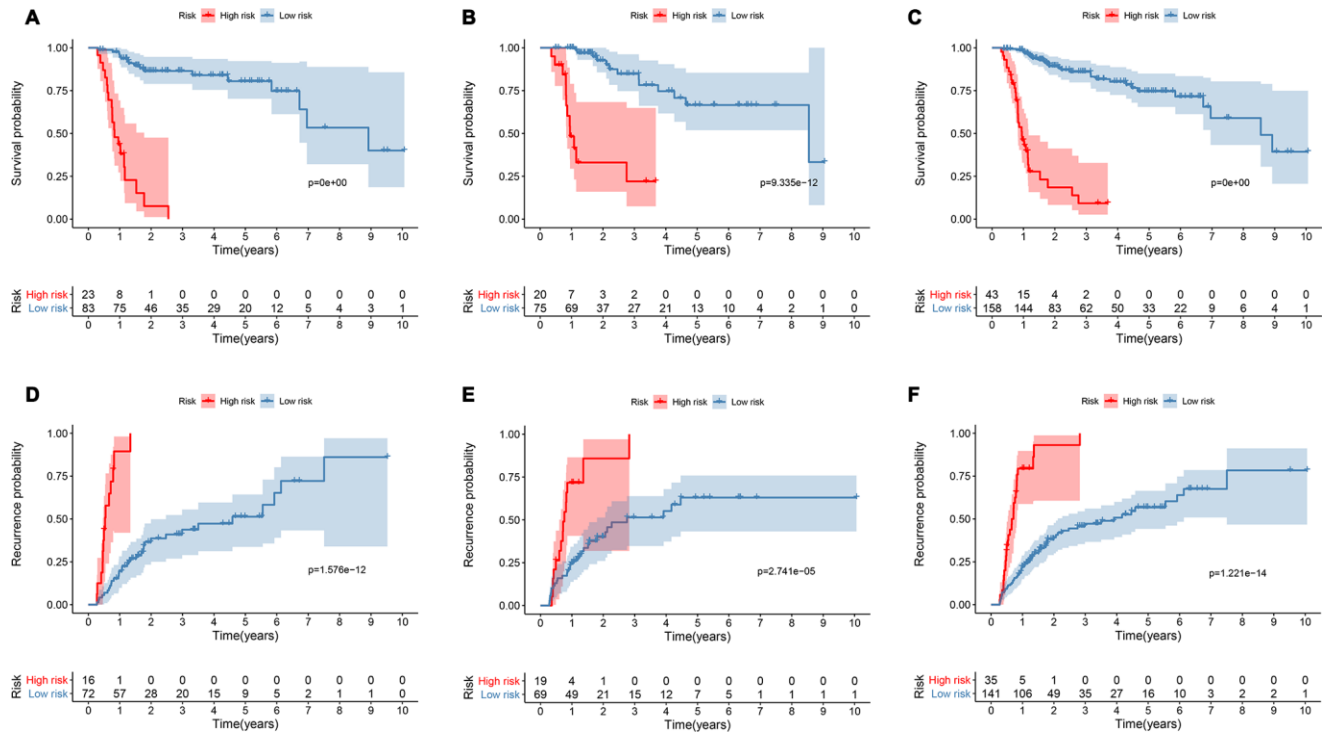

**Supplementary Figure 3. Kaplan-Meier analysis in the training, validation and whole cohorts according to the molecular-clinicopathological nomograms.** Kaplan-meier survival analysis was performed to predict overall survival in the (A) training cohort, (B) test cohort, and (C) TCGA cohort, according to the high-risk and low-risk groups stratified by the OS-nomogram. Kaplan-meier survival analysis was performed to predict recurrence in the (D) training cohort, (E) test cohort, and (F) TCGA cohort, according to the high-risk and low-risk groups stratified by the recurrence-nomogram. OS, overall survival.

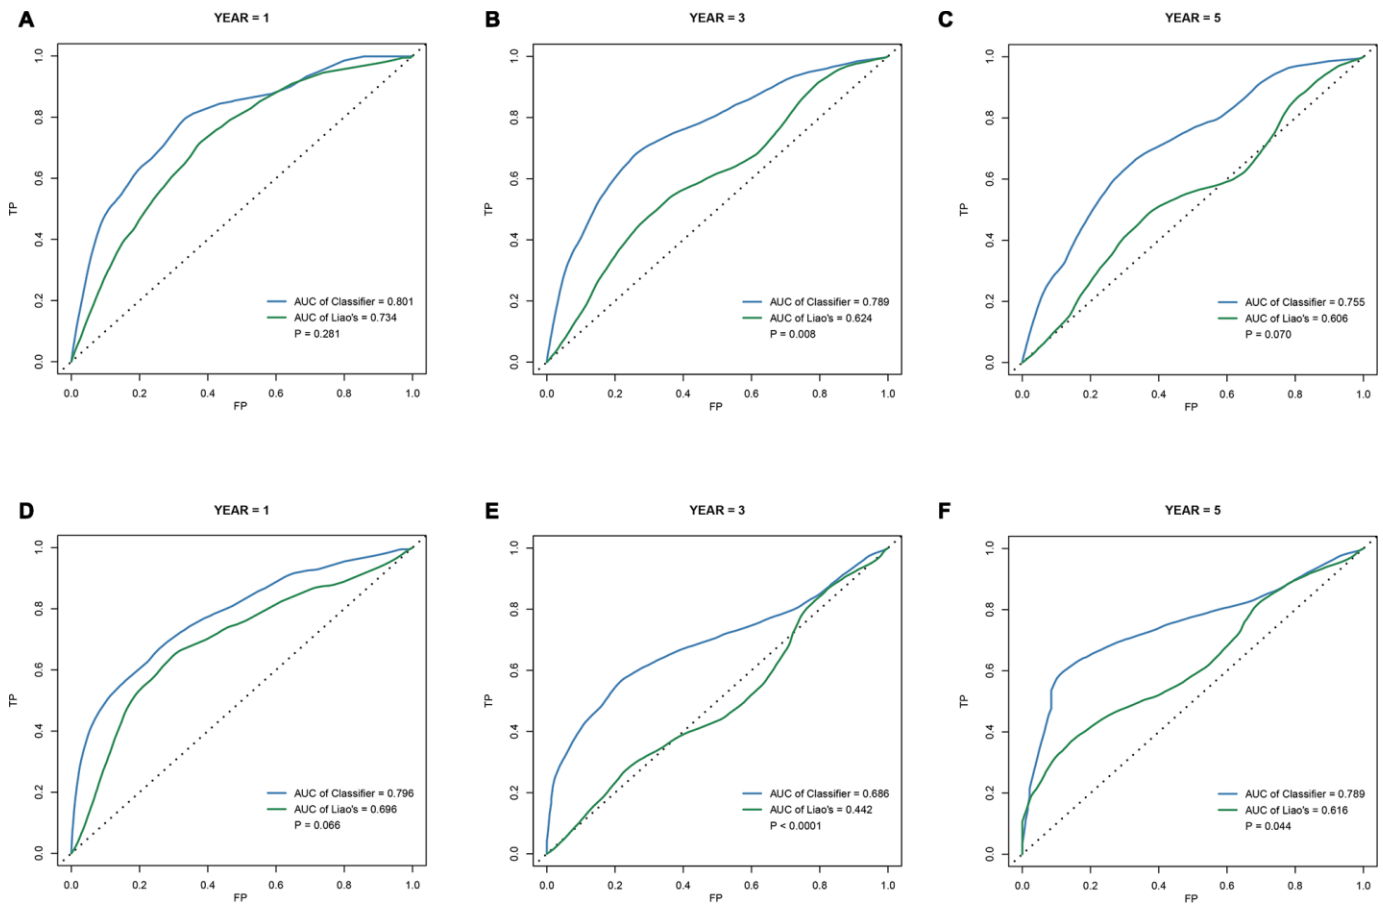

**Supplementary Figure 4. Comparison of Classifiers and Liao's Biomarkers.** (A–C) The 1, 3, and 5-year Time-dependent ROC curves compare the prognostic accuracy of the OS-related Classifier and Liao's Biomarkers (D–F) The 1, 3, and 5-year Time-dependent ROC curves compare the prognostic accuracy of the recurrence-related Classifier and Liao's Biomarkers; OS, overall survival; lncRNA, long non-coding RNA; ROC, receiver operating characteristic.
